# Supplementary material for: The Reference Effects on a Retailer’s Dynamic Pricing and Inventory Strategies with Strategic Consumers
Source: Atypon-hosted journal article supplement (doi:10.1287/opre.2015.1440), 2015-11-20
Supplement: opre.2015.1440-sm-appendix.pdf [file opre.2015.1440-sm-appendix.pdf]

## Appendix

*Proof of Proposition 1.* For any given initial reference  $r_1$ , if we adopt the  $T$  season optimal policies for the first  $T$  seasons and the optimal single season optimal policy for the last season for the  $T + 1$  season problem, we can show that  $V_1^{T+1}(r_1) - V_1^T(r_1) \geq \beta^T \inf_{0 \leq r_{T+1} \leq p} \{V_{T+1}^{T+1}(r_{T+1})\} \geq 0$ . Furthermore,  $V_t^T(r_t)$  is bounded above as long as  $\mathbb{E}(\xi_t) < \infty$  and  $\beta < 1$ . Thus, there exists a  $V(r_t)$  such that  $\lim_{T \rightarrow \infty} V_t^T(r_t) = V(r_t)$ .

Suppose that  $u(r)$  is a bounded solution that satisfies the optimality equation. Then by (1),

$$u(r_t) \geq \mathbb{E} \left[ p \min \{q^*(r_t), d_1(r_t)\xi_t\} - cq^*(r_t) + s^*(\xi_t|r_t) \cdot \min \{d_2(s^*(\xi_t|r_t)|r_t)\xi_t, [q^*(r_t) - d_1(r_t)\xi_t]^+\} + \beta u(\theta s^*(\xi_t|r_t) + (1 - \theta)r_t) \right].$$

Thus,

$$V(r_t) - u(r_t) \leq \beta \mathbb{E} [V(\theta s^*(\xi_t|r_t) + (1 - \theta)r_t) - u(\theta s^*(\xi_t|r_t) + (1 - \theta)r_t)] \leq \beta \sup_{r_{t+1}} \{|V(r_{t+1}) - u(r_{t+1})|\}.$$

Similarly,  $u(r_t) - V(r_t) \leq \beta \sup_{r_{t+1}} \{|V(r_{t+1}) - u(r_{t+1})|\}$ . Therefore,  $\sup_r |V(r) - u(r)| \leq \beta \sup_r \{|V(r) - u(r)|\}$ , which implies  $\sup_r |V(r) - u(r)| = 0$  and  $V(r)$  is unique.

Let  $r_t^*(\xi_t)$ ,  $t = 2, 3, \dots$ , be the subsequent references under the optimal decisions when the initial reference is  $r_1$ . If we adopt the same policy at a higher initial reference  $r'_1$ , the subsequent references  $r'_t(\xi_t) \geq r_t^*(\xi_t)$ ,  $t = 2, 3, \dots$ , and the total profit will be no less than  $V(r_t)$ . Thus,  $V(r)$  increases in  $r$ .  $\square$

Before proving Proposition 2, we need the following lemma. For  $d(p, r) \leq z \leq d(\underline{s}(r), r)$ , let  $\Pi(z, r) = pd_1(r) + \hat{s}(z, r)d_2(\hat{s}(z, r)|r)$  be the unconstrained single season revenue function when the markdown price is set to sell all the inventory, i.e.,  $\hat{s}(z, r)$  is such that  $d(\hat{s}(z, r), r) = z$ .

**Lemma 1.** *Under Assumption 1,  $\Pi(z, r)$  is locally concave when  $\hat{s}(z, r) \geq \underline{s}(r)$ .*

*Proof.* It is sufficient to show that the Hessian  $\begin{pmatrix} \frac{\partial^2 \Pi(z, r)}{\partial z^2} & \frac{\partial^2 \Pi(z, r)}{\partial z \partial r} \\ \frac{\partial^2 \Pi(z, r)}{\partial r \partial z} & \frac{\partial^2 \Pi(z, r)}{\partial r^2} \end{pmatrix}$  is negative semi-definite when  $\hat{s}(z, r) \geq \underline{s}(r)$ .

After some straightforward but tedious algebra, we can simplify the determinant of the Hessian as

$$\begin{aligned}
& \frac{\partial^2 \Pi(z, r)}{\partial r^2} \cdot \frac{\partial^2 \Pi(z, r)}{\partial z^2} - \frac{\partial^2 \Pi(z, r)}{\partial z \partial r} \frac{\partial^2 \Pi(z, r)}{\partial r \partial z} \\
&= \left( \frac{\partial \hat{s}(z, r)}{\partial z} \right)^2 \left[ (p-s)d_1''(r) - \frac{\partial^2 d(s, r)}{\partial r^2} \frac{d_2(s|r)}{\frac{\partial d_2(s|r)}{\partial s}} \right]_{s=\hat{s}(z, r)} \cdot \left[ \frac{\partial^2 \{sd_2(s|r)\}}{\partial s^2} - \frac{\frac{\partial^2 d_2(s|r)}{\partial s^2}}{\frac{\partial d_2(s|r)}{\partial s}} \frac{\partial \{sd_2(s|r)\}}{\partial s} \right]_{s=\hat{s}(z, r)} \\
&\quad - \left( \frac{\partial \hat{s}(z, r)}{\partial z} \right)^2 \left[ \frac{\partial^2 \{sd_2(s|r)\}}{\partial s \partial r} - \frac{\frac{\partial^2 d_2(s|r)}{\partial s \partial r}}{\frac{\partial d_2(s|r)}{\partial s}} \frac{\partial \{sd_2(s|r)\}}{\partial s} \right]_{s=\hat{s}(z, r)}^2 \\
&= \left\{ \left[ \frac{-s \frac{\partial d_2(s|r)}{\partial s}}{d_2(s|r)} (p-s)d_1''(r) + s \frac{\partial^2 d(s, r)}{\partial r^2} \right] \left[ \frac{-s \frac{\partial d_2(s|r)}{\partial s}}{d_2(s|r)} \frac{\partial^2 \{sd_2(s|r)\}}{\partial s^2} + \frac{s \frac{\partial^2 d_2(s|r)}{\partial s^2}}{d_2(s|r)} \frac{\partial \{sd_2(s|r)\}}{\partial s} \right] \right. \\
&\quad \left. - \left[ \frac{-s \frac{\partial d_2(s|r)}{\partial s}}{d_2(s|r)} \frac{\partial^2 \{sd_2(s|r)\}}{\partial s \partial r} + \frac{s \frac{\partial^2 d_2(s|r)}{\partial s \partial r}}{d_2(s|r)} \frac{\partial \{sd_2(s|r)\}}{\partial s} \right]_{s=\hat{s}(z, r)}^2 \right\} \cdot \left( \frac{\partial \hat{s}(z, r)}{\partial z} \right)^2 \left( \frac{d_2(s|r)}{-s \frac{\partial d_2(s|r)}{\partial s}} \right)_{s=\hat{s}(z, r)}^2 \\
&= \left\{ \left[ (p-s)d_1''(r) + s \frac{\partial^2 d(s, r)}{\partial r^2} - \frac{\frac{\partial \{sd_2(s|r)\}}{\partial s}}{d_2(s|r)} (p-s)d_1''(r) \right] \left[ \frac{\partial^2 \{sd_2(s|r)\}}{\partial s^2} - 2 \frac{\frac{\partial d_2(s|r)}{\partial s}}{d_2(s|r)} \frac{\partial \{sd_2(s|r)\}}{\partial s} \right] \right. \\
&\quad \left. - \left[ \frac{\partial^2 \{sd_2(s|r)\}}{\partial s \partial r} - \frac{\frac{\partial d_2(s|r)}{\partial r}}{d_2(s|r)} \frac{\partial \{sd_2(s|r)\}}{\partial s} \right]_{s=\hat{s}(z, r)}^2 \right\} \cdot \left( \frac{\partial \hat{s}(z, r)}{\partial z} \right)^2 \left( \frac{d_2(s|r)}{-s \frac{\partial d_2(s|r)}{\partial s}} \right)_{s=\hat{s}(z, r)}^2 \\
&\geq \left\{ \left[ (p-s)d_1''(r) + s \frac{\partial^2 d(s, r)}{\partial r^2} \right] \left[ \frac{\partial^2 \{sd_2(s|r)\}}{\partial s^2} \right] - \left[ \frac{\partial^2 \{sd_2(s|r)\}}{\partial s \partial r} \right]_{s=\hat{s}(z, r)}^2 \right\} \cdot \left( \frac{\partial \hat{s}(z, r)}{\partial z} \right)^2 \left( \frac{d_2(s|r)}{-s \frac{\partial d_2(s|r)}{\partial s}} \right)_{s=\hat{s}(z, r)}^2 \geq 0.
\end{aligned}$$

The first inequality follows as  $\frac{\partial \{sd_2(s|r)\}}{\partial s} \Big|_{s=\hat{s}(z, r)} \leq 0$  and  $\frac{\partial^2 \{sd_2(s|r)\}}{\partial s \partial r} \geq \frac{\frac{\partial d_2(s|r)}{\partial r}}{d_2(s|r)} \frac{\partial \{sd_2(s|r)\}}{\partial s}$  by part 1 of Assumption 1, and the second inequality holds by part 2 of Assumption 1. Furthermore, it is easy to see that the diagonal elements in the Hessian are non-positive. Therefore, the Hessian is negative semi-definite and  $\Pi(z, r)$  is locally concave when  $\hat{s}(z, r) \geq \underline{s}(r)$ .  $\square$

*Proof of Proposition 2.* Let

$$\begin{aligned}
\phi_t^T(s_t, \xi_t, q_t, r_t) &= s_t \cdot \min \{d_2(s_t|r_t)\xi_t, [q_t - d_1(r_t)\xi_t]^+\} + \beta V_{t+1}^T(\theta s_t + (1-\theta)r_t), \\
\hat{\phi}_t^T(\xi_t, q_t, r_t) &= \max_{\underline{s}(r_t) \leq s_t \leq p} \{\phi_t^T(s_t, \xi_t, q_t, r_t)\} = \phi_t^T(s_t^T(\xi_t, q_t, r_t), \xi_t, q_t, r_t)
\end{aligned}$$

be the total profit from stage 2 of season  $t$  onwards for a given  $(s_t, \xi_t, q_t, r_t)$  and under the optimal markdown price for a given  $(\xi_t, q_t, r_t)$ , respectively. Note that  $V_{t+1}^T(\cdot) \equiv 0$  is concave. Now assume that  $V_{t+1}^T(\cdot)$  is concave and we prove that the proposition holds at  $t$ . As  $T \rightarrow \infty$ ,  $V_t^T(\cdot)$  converges to  $V(\cdot)$  by Proposition 1 and  $V(\cdot)$  is also concave. Thus, the proposition holds as  $T \rightarrow \infty$ .

**Part 3:** The structure of the markdown price  $s_t^T(\xi_t, q_t, r_t)$  for any given  $q_t$ .

For any given  $q_t$ , the stage 2 profit  $s_t \cdot \min \{d_2(s_t|r_t)\xi_t, [q_t - d_1(r_t)\xi_t]^+\}$  is concave in  $s_t$  since  $s_t d_2(s_t|r_t)$  is

concave in  $s_t$  and hence  $\phi_t^T(s_t, \xi_t, q_t, r_t)$  is also concave in  $s_t$ . When  $\xi_t \geq \frac{q_t}{d_1(r_t)}$ , all the inventory is sold at stage 1 and no discount needs to be offered at stage 2, i.e.,  $s_t^T(\xi_t, q_t, r_t) = p$ . When  $\frac{q_t}{d(p, r_t)} \leq \xi_t < \frac{q_t}{d_1(r_t)}$ ,  $d_2(s_t|r_t)\xi_t \geq q_t - d_1(r_t)\xi_t$  for any  $s_t$  and the retailer will sell all its inventory regardless of the markdown price. Thus, the retailer will maximize the future profit by not marking down, i.e.,  $s_t^T(\xi_t, q_t, r_t) = p$ . When  $\xi_t < \frac{q_t}{d(p, r_t)}$ , the sales at stage 2 is bounded by the available inventory and it is never optimal for the retailer to set the markdown price such that  $d_2(s_t|r_t)\xi_t > q_t - d_1(r_t)\xi_t$ . Thus, the stage 2 problem is equivalent to solving the following maximization problem,

$$\max_{\underline{s}(r_t) \leq s_t \leq p} \quad s_t d_2(s_t|r_t)\xi_t + \beta V_{t+1}^T(\theta s_t + (1-\theta)r_t) \quad (4)$$

$$\text{s.t.} \quad d_2(s_t|r_t)\xi_t \leq [q_t - d_1(r_t)\xi_t]^+ \quad (5)$$

If there are multiple solutions, we choose the largest one. Since

$$\frac{\partial^2 \{s_t d_2(s_t|r_t)\xi_t + \beta V_{t+1}^T(\theta s_t + (1-\theta)r_t)\}}{\partial \xi_t \partial s_t} = \frac{\partial \{s_t d_2(s_t|r_t)\}}{\partial s_t} \leq 0,$$

the objective function (4) is submodular in  $(\xi_t, s_t)$  and hence the markdown price that maximizes the objective function decreases in  $\xi_t$ . As  $\xi_t$  increases, the right hand side of (5) decreases and the left hand side increases. Thus, there exists  $\xi_t^T(q_t, r_t)$  such that  $s_t^T(\xi_t, q_t, r_t)$  decreases for  $\xi_t \leq \xi_t^T(q_t, r_t)$ , and increases for  $\xi_t > \xi_t^T(q_t, r_t)$ . The constraint is binding at  $s_t^T(\xi_t^T(q_t, r_t), q_t, r_t)$ . Thus, the optimal markdown decision as a function of  $\xi_t$  can be summarized as follows.

- When  $\xi_t < \frac{\theta \beta V_{t+1}^T(\theta p + (1-\theta)r_t)}{-\frac{\partial \{s_t d_2(s_t|r_t)\}}{\partial s_t} \Big|_{s_t=p}}$ , the total market size is so small that the objective function (4) is monotonically increasing in  $s_t$ . Thus, the retailer has no incentive to mark down and  $s_t^T(\xi_t, q_t, r_t) = p$ . There is unsold inventory at the end of the season.

- When  $\frac{\theta \beta V_{t+1}^T(\theta p + (1-\theta)r_t)}{-\frac{\partial \{s_t d_2(s_t|r_t)\}}{\partial s_t} \Big|_{s_t=p}} \leq \xi_t < \xi_t^T(q_t, r_t)$ ,  $s_t^T(\xi_t, q_t, r_t)$  is the solution to

$$\frac{\partial \phi_t^T(s_t, \xi_t, q_t, r_t)}{\partial s_t} = \frac{\partial \{s_t d_2(s_t|r_t)\}}{\partial s_t} \xi_t + \theta \beta V_{t+1}^T(\theta s_t + (1-\theta)r_t) = 0, \quad (6)$$

independent of  $q_t$ , and there is unsold inventory at the end of the season.

- When  $\xi_t^T(q_t, r_t) \leq \xi_t < \frac{q_t}{d(p, r_t)}$ ,  $s_t^T(\xi_t, q_t, r_t)$  is the solution to  $d_2(s_t|r_t)\xi_t = q_t - d_1(r_t)\xi_t$  and there is no unsold inventory. In this region,  $\frac{\partial \phi_t^T(s_t, \xi_t, q_t, r_t)}{\partial s_t} \Big|_{s_t=s_t^T(\xi_t, q_t, r_t)} \leq 0$ .
- When  $\xi_t \geq \frac{q_t}{d(p, r_t)}$ , there is no need to mark down, i.e.,  $s_t^T(\xi_t, q_t, r_t) = p$ .

Part 2: The concavity of  $v_t^T(q_t, r_t)$  and the optimal structure of  $q^*(r_t)$ .

Note that  $s_t^T(\xi_t, q_t, r_t)$  depends on  $q_t$  only when  $\xi_t^T(q_t, r_t) \leq \xi_t < \frac{q_t}{d(p, r_t)}$ , in which case all the inventory is sold, i.e.,  $q_t - d_1(r_t)\xi_t = d_2(s_t^T(\xi_t, q_t, r_t)|r_t)\xi_t$  and  $\left. \frac{\partial \phi_t^T(s_t, \xi_t, q_t, r_t)}{\partial s_t} \right|_{s_t=s_t^T(\xi_t, q_t, r_t)} \leq 0$ . Taking the derivative of

$$v_t^T(q_t, r_t) = \int_0^\infty [p \min\{d_1(r_t)\xi_t, q_t\} + \hat{\phi}_t^T(\xi_t, q_t, r_t)] dF(\xi_t) - cq_t$$

with respect to  $q_t$  yields

$$\begin{aligned} \frac{\partial v_t^T(q_t, r_t)}{\partial q_t} &= p\bar{F}\left(\frac{q_t}{d(p, r_t)}\right) + \int_{\xi_t^T(q_t, r_t)}^{\frac{q_t}{d(p, r_t)}} \frac{\partial \hat{\phi}_t^T(\xi_t, q_t, r_t)}{\partial q_t} dF(\xi_t) - c \\ &= \int_{\xi_t^T(q_t, r_t)}^{\frac{q_t}{d(p, r_t)}} \frac{\partial s_t^T(\xi_t, q_t, r_t)}{\partial q_t} \frac{\partial \phi_t^T(s_t, \xi_t, q_t, r_t)}{\partial s_t} \Big|_{s_t=s_t^T(\xi_t, q_t, r_t)} dF(\xi_t) + p\bar{F}\left(\frac{q_t}{d(p, r_t)}\right) - c, \end{aligned}$$

and

$$\begin{aligned} \frac{\partial^2 v_t^T(q_t, r_t)}{\partial q_t^2} &= \int_{\xi_t^T(q_t, r_t)}^{\frac{q_t}{d(p, r_t)}} \left( \frac{\partial s_t^T(\xi_t, q_t, r_t)}{\partial q_t} \right)^2 \cdot \left\{ \frac{\partial^2 \phi_t^T(s_t, \xi_t, q_t, r_t)}{\partial s_t^2} - \frac{\frac{\partial^2 d_2(s_t|r_t)}{\partial s_t^2}}{\frac{\partial d_2(s_t|r_t)}{\partial s_t}} \frac{\partial \phi_t^T(s_t, \xi_t, q_t, r_t)}{\partial s_t} \right\}_{s_t=s_t^T(\xi_t, q_t, r_t)} dF(\xi_t) \\ &\quad - \frac{1}{d(p, r_t)} f\left(\frac{q_t}{d(p, r_t)}\right) \left\{ p - \left[ \frac{\partial s_t^T(\xi_t, q_t, r_t)}{\partial q_t} \frac{\partial \phi_t^T(s_t, \xi_t, q_t, r_t)}{\partial s_t} \right]_{\xi_t=\frac{q_t}{d(p, r_t)}, s_t=p} \right\}. \end{aligned}$$

The second line of  $\frac{\partial^2 v_t^T(q_t, r_t)}{\partial q_t^2}$  is non-positive since

$$\begin{aligned} &p - \left[ \frac{\partial s_t^T(\xi_t, q_t, r_t)}{\partial q_t} \frac{\partial \phi_t^T(s_t, \xi_t, q_t, r_t)}{\partial s_t} \right]_{\xi_t=\frac{q_t}{d(p, r_t)}, s_t=p} \\ &= p - \left\{ \frac{1}{\frac{\partial d_2(s_t|r_t)}{\partial s_t} \xi_t} \left[ \left( s_t \frac{\partial d_2(s_t|r_t)}{\partial s_t} + d_2(s_t|r_t) \right) \xi_t + \theta \beta V_t^{T'}(\theta s_t + (1-\theta)r_t) \right] \right\}_{\xi_t=\frac{q_t}{d(p, r_t)}, s_t=p} \\ &= \frac{d(p, r_t)}{-q_t \frac{\partial d_2(s_t|r_t)}{\partial s_t} \Big|_{s_t=p}} \left[ d_2(s_t|r_t) \frac{q_t}{d(p, r_t)} + \theta \beta V_t^{T'}(\theta p + (1-\theta)r_t) \right] \geq 0. \end{aligned}$$

We now show that the first line of  $\frac{\partial^2 v_t^T(q_t, r_t)}{\partial q_t^2}$  is negative by proving that the term in  $\{\}$  is negative at  $s_t = s_t^T(\xi_t, q_t, r_t)$  for any  $\xi_t$ ,  $\xi_t^T(q_t, r_t) < \xi_t < \frac{q_t}{d(p, r_t)}$ . We first note that, for  $\xi_t^T(y_t, r_t) < \xi_t < \frac{q_t}{d(p, r_t)}$ ,

$$\left. \frac{\partial \{s_t d_2(s_t|r_t)\}}{\partial s_t} \right|_{s_t=s_t^T(\xi_t, q_t, r_t)} < 0 \text{ or } \left. \frac{\partial d_2(s_t|r_t)}{\partial s_t} \right|_{s_t=s_t^T(\xi_t, q_t, r_t)} < -\frac{d_2(s_t^T(\xi_t, q_t, r_t)|r_t)}{s_t^T(\xi_t, q_t, r_t)} \leq 0 \text{ and}$$

$$\begin{aligned} \left. \frac{\partial \phi_t^T(s_t, \xi_t, q_t, r_t)}{\partial s_t} \right|_{s_t=s_t^T(\xi_t, q_t, r_t)} &= \left[ \frac{\partial \{s_t d_2(s_t|r_t)\}}{\partial s_t} \xi_t + \theta \beta V_{t+1}^{T'}(\theta s_t + (1-\theta)r_t) \right]_{s_t=s_t^T(\xi_t, q_t, r_t)} \\ &< \left[ \frac{\partial \{s_t d_2(s_t|r_t)\}}{\partial s_t} \xi_t^T(q_t, r_t) + \theta \beta V_{t+1}^{T'}(\theta s_t + (1-\theta)r_t) \right]_{s_t=s_t^T(\xi_t, q_t, r_t)} \\ &\leq \left. \frac{\partial \phi_t^T(s_t, \xi_t, q_t, r_t)}{\partial s_t} \right|_{\substack{s_t=s_t^T(\xi_t^T(q_t, r_t), q_t, r_t) \\ \xi_t=\xi_t^T(q_t, r_t)}} = 0, \end{aligned}$$

where the last inequality follows from the concavity of  $\phi_t^T(s_t, \xi_t, q_t, r_t)$  in  $s_t$ . Thus, if  $\frac{\partial^2 d_2(s_t|r_t)}{\partial s_t^2} \Big|_{s_t=s_t^T(\xi_t, q_t, r_t)} > 0$ , then the term in  $\{\}$  is negative at  $s_t^T(\xi_t, q_t, r_t)$ . Otherwise,

$$\begin{aligned} & \frac{\partial^2 \phi_t^T(s_t, \xi_t, q_t, r_t)}{\partial s_t^2} - \frac{\frac{\partial^2 d_2(s_t|r_t)}{\partial s_t^2}}{\frac{\partial d_2(s_t|r_t)}{\partial s_t}} \frac{\partial \phi_t^T(s_t, \xi_t, q_t, r_t)}{\partial s_t} \\ &= \theta^2 \beta V_{t+1}^{T''}(\theta s_t + (1-\theta)r_t) + \frac{\partial^2 \{s_t d_2(s_t|r_t)\}}{\partial s_t^2} \xi_t - \frac{\frac{\partial^2 d_2(s_t|r_t)}{\partial s_t^2}}{\frac{\partial d_2(s_t|r_t)}{\partial s_t}} \left[ \frac{\partial \{s_t d_2(s_t|r_t)\}}{\partial s_t} \xi_t + \theta \beta V_{t+1}^{T'}(\theta s_t + (1-\theta)r_t) \right] \\ &\leq \frac{1}{\frac{\partial d_2(s_t|r_t)}{\partial s_t}} \left\{ 2 \left[ \frac{\partial d_2(s_t|r_t)}{\partial s_t} \right]^2 \xi_t - \frac{\partial^2 d_2(s_t|r_t)}{\partial s_t^2} [d_2(s_t|r_t) \xi_t + \theta \beta V_{t+1}^{T'}(\theta s_t + (1-\theta)r_t)] \right\} \\ &\leq 2 \frac{\partial d_2(s_t|r_t)}{\partial s_t} \xi_t \end{aligned}$$

which is negative at  $s_t = s_t^T(\xi_t, q_t, r_t)$ . Thus, the term in  $\{\}$  is also negative at  $s_t^T(\xi_t, q_t, r_t)$  and hence,  $\frac{\partial^2 v_t^T(q_t, r_t)}{\partial q_t^2} < 0$ , i.e.,  $v_t^T(q_t, r_t)$  is strictly concave in  $q_t$  and  $q_t^{T*}(r_t)$  is the unique solution to  $\frac{\partial v_t^T(q_t, r_t)}{\partial q_t} \Big|_{q_t=q_t^{T*}(r_t)} = 0$ . Furthermore,  $\frac{dq_t^{T*}(r_t)}{dr_t} = \frac{\frac{\partial^2 v_t^T(q_t, r_t)}{\partial q_t \partial r_t}}{\frac{\partial^2 v_t^T(q_t, r_t)}{\partial q_t^2}} \Big|_{q_t=q_t^{T*}(r_t)}$  by the implicit function theorem.

Note that  $\frac{\partial s_t^T(\xi_t, q_t, r_t)}{\partial q_t} \frac{\partial \phi_t^T(s_t, \xi_t, q_t, r_t)}{\partial s_t} \Big|_{s_t=s_t^T(\xi_t, q_t, r_t)} \geq 0$  and hence  $p\bar{F}\left(\frac{q_t^{T*}(r_t)}{d(p, r_t)}\right) - c \leq 0$ . Thus,  $\frac{q_t^{T*}(r_t)}{d(p, r_t)} \geq F^{-1}\left(\frac{p-c}{p}\right)$  for any  $r_t$ , which will be used in the proof of Proposition 5.

Part 1: The concavity of  $V_t^T(r_t)$ .

Suppose that  $r_t^\ell < r_t^h$ . At  $r_t = \frac{r_t^\ell + r_t^h}{2}$ , let the retailer orders  $q_t(r_t) = \frac{q_t^{T*}(r_t^\ell) + q_t^{T*}(r_t^h)}{2}$  and set the markdown price at<sup>1</sup>

$$s_t(\xi_t|r_t) = \begin{cases} p, & \text{if } d(p, r_t)\xi_t > q_t(r_t), \\ \frac{s_t^{T*}(\xi_t|r_t^\ell) + s_t^{T*}(\xi_t|r_t^h)}{2}, & \text{if } d(p, r_t)\xi_t \leq q_t(r_t) \text{ but } d\left(\frac{s_t^{T*}(\xi_t|r_t^\ell) + s_t^{T*}(\xi_t|r_t^h)}{2}, r_t\right)\xi_t \leq q_t(r_t) \\ & \text{or } s_t^{T*}(\xi_t|r_t^\ell) \leq s_t^{T*}(\xi_t|r_t^h), \\ d^{-1}\left(\frac{q_t(r_t)}{\xi_t}, r_t\right) > \frac{s_t^{T*}(\xi_t|r_t^\ell) + s_t^{T*}(\xi_t|r_t^h)}{2}, & \text{otherwise.} \end{cases}$$

By Assumption 1,  $\frac{-\partial d_2(s_t|r_t)}{\partial s_t d_2(s_t|r_t)}$  decreases in  $r_t$ , which guarantees the supermodularity of  $sd_2(s|r)$  and leads to

$$d^{-1}\left(\frac{q_t(r_t)}{\xi_t}, r_t\right) \geq \frac{s_t^{T*}(\xi_t|r_t^\ell) + s_t^{T*}(\xi_t|r_t^h)}{2} \geq s_t^{T*}(\xi_t|r_t^h) \geq \underline{s}(r_t^h) \geq \underline{s}(r_t).$$

Due to the monotonicity and concavity of  $V_{t+1}^T(\cdot)$ , the future profit at  $r_t$  is at least

$\frac{V_{t+1}^T(\theta s_t^{T*}(\xi_t|r_t^\ell) + (1-\theta)r_t^\ell) + V_{t+1}^T(\theta s_t^{T*}(\xi_t|r_t^h) + (1-\theta)r_t^h)}{2}$  for any given  $\xi_t$ . Let  $\pi(s, \xi, q, r)$  denote the single season revenue for given  $(s, \xi, q, r)$  and  $\hat{\pi}(\xi_t, r)$  be the season  $t$  revenue under the optimal ordering and markdown prices from season  $t$  to  $T$  for given  $(\xi_t, r)$ . Now consider the season  $t$  revenue  $\pi(s_t(\xi_t|r_t), \xi_t, q_t(r_t), r_t)$ .

<sup>1</sup>We define the inverse demand function as  $d^{-1}(z, r) = s$  if  $d(s, r) = z$  for  $d(p, r) \leq z \leq d(\underline{s}(r), r)$ .

1. If  $d(p, r_t)\xi_t > q_t(r_t)$ ,  $\pi(s_t(\xi_t|r_t), \xi_t, q_t(r_t), r_t) = pq_t(r_t) = \frac{pq_t^{T^*}(r_t^\ell)}{2} + \frac{pq_t^{T^*}(r_t^h)}{2} \geq \frac{1}{2}\hat{\pi}(\xi_t, r_t^\ell) + \frac{1}{2}\hat{\pi}(\xi_t, r_t^h)$ .
2. If  $d(p, r_t)\xi_t \leq q_t(r_t)$ ,  $d\left(\frac{s_t^{T^*}(\xi_t|r_t^\ell) + s_t^{T^*}(\xi_t|r_t^h)}{2}, r_t\right)\xi_t \leq q_t(r_t)$ , then

$$\begin{aligned} \pi(s_t(\xi_t|r_t), \xi_t, q_t(r_t), r_t) &= pd_1(r_t)\xi_t + s_t(\xi_t|r_t)d_2(s_t(\xi_t|r_t)|r_t)\xi_t \\ &\geq \frac{1}{2}\left[pd_1(r_t^\ell)\xi_t + s_t^{T^*}(\xi_t|r_t^\ell) \cdot d_2(s_t^{T^*}(\xi_t|r_t^\ell)|r_t^\ell)\xi_t\right] + \frac{1}{2}\left[pd_1(r_t^h)\xi_t + s_t^{T^*}(\xi_t|r_t^h) \cdot d_2(s_t^{T^*}(\xi_t|r_t^h)|r_t^h)\xi_t\right] \\ &\geq \frac{1}{2}\hat{\pi}(\xi_t, r_t^\ell) + \frac{1}{2}\hat{\pi}(\xi_t, r_t^h) \end{aligned}$$

due to the joint concavity of the unconstrained single season revenue function in  $(s, r)$ .

3. If  $d(p, r_t)\xi_t \leq q_t(r_t)$ ,  $d\left(\frac{s_t^{T^*}(\xi_t|r_t^\ell) + s_t^{T^*}(\xi_t|r_t^h)}{2}, r_t\right)\xi_t > q_t(r_t)$  and  $s_t^{T^*}(\xi_t|r_t^\ell) \leq s_t^{T^*}(\xi_t|r_t^h)$ , then  $d_2(s_t^{T^*}(\xi_t|r_t^\ell)|r_t^\ell) \geq d_2(s_t^{T^*}(\xi_t|r_t^h)|r_t^h)$ .

(a) If  $d(s_t^{T^*}(\xi_t|r_t^\ell), r_t^\ell)\xi_t > q_t^{T^*}(r_t^\ell)$ , then  $p = s_t^{T^*}(\xi_t|r_t^\ell) \leq s_t^{T^*}(\xi_t|r_t^h)$  and hence  $s_t(\xi_t|r_t) = p$ . We have  $\pi(s_t(\xi_t|r_t), \xi_t, q_t(r_t), r_t) = pq_t(r_t) \geq \frac{1}{2}\hat{\pi}(\xi_t, r_t^\ell) + \frac{1}{2}\hat{\pi}(\xi_t, r_t^h)$ .

(b) If  $d(s_t^{T^*}(\xi_t|r_t^\ell), r_t^\ell)\xi_t \leq q_t^{T^*}(r_t^\ell)$ ,

$$\begin{aligned} \pi(s_t(\xi_t|r_t), \xi_t, q_t(r_t), r_t) &= pd_1(r_t)\xi_t + s_t(\xi_t|r_t)[q_t(r_t) - d_1(r_t)\xi_t] \\ &= [p - s_t(\xi_t|r_t)]d_1(r_t)\xi_t + s_t(\xi_t|r_t)q_t(r_t) \\ &\geq [p - s_t(\xi_t|r_t)] \cdot \frac{\min\{d_1(r_t^\ell)\xi_t, q_t^{T^*}(r_t^\ell)\} + \min\{d_1(r_t^h)\xi_t, q_t^{T^*}(r_t^h)\}}{2} \\ &\quad + \frac{s_t^{T^*}(\xi_t|r_t^\ell) + s_t^{T^*}(\xi_t|r_t^h)}{2} \cdot \frac{q_t^{T^*}(r_t^\ell) + q_t^{T^*}(r_t^h)}{2}. \end{aligned}$$

- If  $d(s_t^{T^*}(\xi_t|r_t^h), r_t^h)\xi_t > q_t^{T^*}(r_t^h)$ , then

$$q_t^{T^*}(r_t^h) - d_1(r_t^h)\xi_t < d_2(s_t^{T^*}(\xi_t|r_t^h)|r_t^h)\xi_t \leq d_2(s_t^{T^*}(\xi_t|r_t^\ell)|r_t^\ell)\xi_t \leq q_t^{T^*}(r_t^\ell) - d_1(r_t^\ell)\xi_t$$

and

$$\begin{aligned} \pi(s_t(\xi_t|r_t), \xi_t, q_t(r_t), r_t) &\geq \frac{1}{4}[s_t^{T^*}(\xi_t|r_t^h) - s_t^{T^*}(\xi_t|r_t^\ell)] \left\{ [q_t^{T^*}(r_t^\ell) - d_1(r_t^\ell)\xi_t] - [q_t^{T^*}(r_t^h) - d_1(r_t^h)\xi_t]^+ \right\} \\ &\quad + \frac{1}{2}\hat{\pi}(\xi_t, r_t^\ell) + \frac{1}{2}\hat{\pi}(\xi_t, r_t^h) \geq \frac{1}{2}\hat{\pi}(\xi_t, r_t^\ell) + \frac{1}{2}\hat{\pi}(\xi_t, r_t^h). \end{aligned}$$

- If  $d(s_t^{T^*}(\xi_t|r_t^h), r_t^h)\xi_t \leq q_t^{T^*}(r_t^h)$ , then  $q_t^{T^*}(r_t^h) - d_1(r_t^h)\xi_t \geq d_2(s_t^{T^*}(\xi_t|r_t^h)|r_t^h)\xi_t$ ,  $q_t^{T^*}(r_t^\ell) - d_1(r_t^\ell)\xi_t \geq d_2(s_t^{T^*}(\xi_t|r_t^\ell)|r_t^\ell)\xi_t$ , and

$$\begin{aligned} \pi(s_t(\xi_t|r_t), \xi_t, q_t(r_t), r_t) &\geq \frac{1}{4}[s_t^{T^*}(\xi_t|r_t^h) - s_t^{T^*}(\xi_t|r_t^\ell)] \cdot [d_2(s_t^{T^*}(\xi_t|r_t^\ell)|r_t^\ell) - d_2(s_t^{T^*}(\xi_t|r_t^h)|r_t^h)] \\ &\quad + \frac{1}{2}\hat{\pi}(\xi_t, r_t^\ell) + \frac{1}{2}\hat{\pi}(\xi_t, r_t^h) \geq \frac{1}{2}\hat{\pi}(\xi_t, r_t^\ell) + \frac{1}{2}\hat{\pi}(\xi_t, r_t^h). \end{aligned}$$

4. If  $d(p, r_t)\xi_t \leq q_t(r_t) < d\left(\frac{s_t^{T^*}(\xi_t|r_t^\ell) + s_t^{T^*}(\xi_t|r_t^h)}{2}, r_t\right)\xi_t$  and  $s_t^{T^*}(\xi_t|r_t^\ell) > s_t^{T^*}(\xi_t|r_t^h)$ , then

$$d^{-1}\left(\frac{\min\{d(s_t^{T^*}(\xi_t, r_t^\ell), r_t^\ell)\xi_t, q_t^{T^*}(r_t^\ell)\} + \min\{d(s_t^{T^*}(\xi_t, r_t^h), r_t^h)\xi_t, q_t^{T^*}(r_t^h)\}}{2\xi_t}, r_t\right) \geq d^{-1}\left(\frac{q_t(r_t)}{\xi_t}, r_t\right) \geq \underline{s}(r_t).$$

By Lemma 1,  $pd_1(r)\xi + d^{-1}\left(\frac{q}{\xi}|r\right)[q - d_1(r)\xi]^+$  is concave on the line segment between the points  $\left(\min\{d(s_t^{T^*}(\xi_t, r_t^\ell), r_t^\ell)\xi_t, q_t^{T^*}(r_t^\ell)\}, r_t^\ell\right)$  and  $\left(\min\{d(s_t^{T^*}(\xi_t, r_t^h), r_t^h)\xi_t, q_t^{T^*}(r_t^h)\}, r_t^h\right)$ . Thus,

$$\begin{aligned} \pi(s_t(\xi_t|r_t), \xi_t, q_t(r_t), r_t) &= pd_1(r_t)\xi_t + d^{-1}\left(\frac{q_t(r_t)}{\xi_t}, r_t\right)[q_t(r_t) - d_1(r_t)\xi_t]^+ \\ &\geq pd_1(r_t)\xi_t + d^{-1}\left(\frac{\min\{d(s_t^{T^*}(\xi_t, r_t^\ell), r_t^\ell)\xi_t, q_t^{T^*}(r_t^\ell)\} + \min\{d(s_t^{T^*}(\xi_t, r_t^h), r_t^h)\xi_t, q_t^{T^*}(r_t^h)\}}{2\xi_t}, r_t\right) \\ &\quad \cdot \left[\frac{\min\{d(s_t^{T^*}(\xi_t, r_t^\ell), r_t^\ell)\xi_t, q_t^{T^*}(r_t^\ell)\} + \min\{d(s_t^{T^*}(\xi_t, r_t^h), r_t^h)\xi_t, q_t^{T^*}(r_t^h)\}}{2} - d_1(r_t)\xi_t\right]^+ \\ &\geq \frac{1}{2}\left\{p\min\{d_1(r_t^\ell)\xi_t, q_t^{T^*}(r_t^\ell)\} + d^{-1}\left(\frac{\min\{d(s_t^{T^*}(\xi_t, r_t^\ell), r_t^\ell)\xi_t, q_t^{T^*}(r_t^\ell)\}}{\xi_t}\Big|_{r_t^\ell}\right)[q_t^{T^*}(r_t^\ell) - d_1(r_t^\ell)\xi_t]^+\right\} \\ &\quad + \frac{1}{2}\left\{p\min\{d_1(r_t^h)\xi_t, q_t^{T^*}(r_t^h)\} + d^{-1}\left(\frac{\min\{d(s_t^{T^*}(\xi_t, r_t^h), r_t^h)\xi_t, q_t^{T^*}(r_t^h)\}}{\xi_t}\Big|_{r_t^h}\right)[q_t^{T^*}(r_t^h) - d_1(r_t^h)\xi_t]^+\right\} \\ &= \frac{1}{2}\hat{\pi}(\xi_t, r_t^\ell) + \frac{1}{2}\hat{\pi}(\xi_t, r_t^h). \end{aligned}$$

□

*Proof of Proposition 3.* Under the optimal policy  $s_t = s^*(\xi_t|r_t)$ ,  $\{r_t : t = 1, 2, \dots\}$  has the Markov property and hence is a Markov process on a compact state space. Furthermore,  $\xi_t$  is a continuous random variable on  $(0, \infty)$  and  $s^*(\xi_t|r_t)$  is continuous. According to Exercise 11.4 in Stokey et al. (1989), the transition function  $r_{t+1} = \theta s^*(\xi_t|r_t) + (1 - \theta)r_t$  satisfies condition D and hence Theorem 11.10 can be applied. As a result, there exists a unique invariant measure  $\Lambda(r)$  (we call it steady-state distribution) and the process is ergodic. □

*Proof of Proposition 4.* By part 2 of Assumption 2,

$$0 \leq \frac{\partial d(s^*(\xi_t|r_t), r_t)}{\partial r_t} = d'_1(r_t) + \frac{\partial d_2(s_t|r_t)}{\partial r_t}\Big|_{s_t=s^*(\xi_t|r_t)} + \frac{ds^*(\xi_t|r_t)}{dr_t} \cdot \frac{\partial d_2(s_t|r_t)}{\partial s_t}\Big|_{s_t=s^*(\xi_t|r_t)},$$

and hence

$$\frac{ds^*(\xi_t|r_t)}{dr_t} \leq \frac{d'_1(r_t) + \frac{\partial d_2(s_t|r_t)}{\partial r_t}\Big|_{s_t=s^*(\xi_t|r_t)}}{-\frac{\partial d_2(s_t|r_t)}{\partial s_t}\Big|_{s_t=s^*(\xi_t|r_t)}} \leq 1,$$

where the last inequality follows from part 1 of Assumption 2.

Thus,  $\mathbb{E}\left[\frac{ds^*(\xi_t|r_t)}{dr_t}\right] \leq 1$  and  $\mathbb{E}[s^*(\xi_t|r_t) - r_t|r_t]$  decreases in  $r_t$ , which implies that  $\mathbb{E}[r_{t+1}^*|r_t]$  as a function of  $r_t$  crosses the 45 degree line at most once and from above the line as  $\mathbb{E}[r_{t+1}^*|r_t = \underline{s}] > \underline{s}$ . Therefore, there exists  $\Gamma$  such that  $\mathbb{E}[r_{t+1}^*|r_t] \geq r_t$  for  $r_t \leq \Gamma$  and  $\mathbb{E}[r_{t+1}^*|r_t] < r_t$  for  $r_t > \Gamma$ , and  $r_t$  is mean-reverting. □

*Proof of Proposition 5.* We only need to consider the case where the reference is  $p$  in season 1. If a retailer never marks down, then  $r_t = p$  for all  $t$  and the retailer will order  $\tilde{q} = d(p, p)F^{-1}\left(\frac{p-c}{p}\right)$ , a newsvendor solution.

Consider the marginal gain at stage 2 of season 1 as a function of the order quantity  $q_1$  and demand realization  $\xi_1$  if the retailer marks down

$$-\frac{\partial\{s_1 \min\{d_2(s_1, p)\xi_1, q_1 - d_1(p)\xi_1\}\}}{\partial s_1}\Bigg|_{s_1=p} = \begin{cases} -\xi_1 \frac{\partial\{s_1 d_2(s_1, p)\}}{\partial s_1}\Big|_{s_1=p}, & \text{if } \xi_1 < \frac{q_1}{d(p, p)}, \\ -[q_1 - d_1(p)\xi_1] \leq 0, & \text{if } \frac{q_1}{d(p, p)} \leq \xi_1 < \frac{q_1}{d_1(p)}, \\ 0, & \text{if } \xi_1 \geq \frac{q_1}{d_1(p)}. \end{cases}$$

Thus, the retailer will never mark down if  $\frac{\partial\{s_1 d_2(s_1, p)\}}{\partial s_1}\Big|_{s_1=p} \geq 0$  as markdown will only lower future profit, which is equivalent to  $\underline{s}(p) = p$ . Now suppose that  $\frac{\partial\{s_1 d_2(s_1, p)\}}{\partial s_1}\Big|_{s_1=p} < 0$ , in which case the maximum marginal gain from a markdown is less than  $-\frac{\tilde{q}}{d(p, p)} \frac{\partial\{s_1 d_2(s_1, p)\}}{\partial s_1}\Big|_{s_1=p}$ . The retailer will never mark down if the minimum marginal loss of the future revenue is larger than the maximum marginal gain at stage 2 in season 1.

Since the reference in season  $t$ ,  $t = 2, 3, \dots$ , is given by

$$r_t = \theta s_{t-1} + \theta(1 - \theta)s_{t-2} + \dots + \theta(1 - \theta)^{t-2}s_1 + (1 - \theta)^{t-1}p, \quad (7)$$

a markdown in season 1 reduces the references for all subsequent seasons. Let  $S_t(s_1, \xi)$  be the set of the optimal decisions from season 2 to  $t$ , given the markdown price in season 1 is  $s_1$  and a sample path of the demand up to season  $t$ . Consider the marginal profit loss in season  $t$  from a markdown in season 1,  $s_1 < p$ , as a function of  $\xi_t$ . When  $\xi_t < \xi_t^\infty(q^*(r_t), r_t)$ , there is unsold inventory in season  $t$  and the marginal loss

$$\begin{aligned} & \frac{\partial\{pd_1(r_t)\xi_t - cq^*(r_t) + s^*(\xi_t|r_t)d_2(s^*(\xi_t|r_t), r_t)\xi_t\}}{\partial s_1}\Bigg|_{s_1=p} \\ & \geq \left( \frac{\partial\{pd_1(r_t)\xi_t + s_t d_2(s_t|r_t)\xi_t\}}{\partial r_t} \cdot \frac{\partial r_t}{\partial s_1}\Bigg|_{s_1=p} \right)_{\substack{(q_i, s_i) \in S_t(s_1, \xi) \\ i=1, \dots, t}} \\ & = \theta(1 - \theta)^{t-2} \left[ pd_1'(r_t)\xi_t + s_t \frac{\partial d_2(s_t|r_t)}{\partial r_t} \xi_t \right]_{\substack{(q_i, s_i) \in S_t(s_1, \xi) \\ i=1, \dots, t}} \\ & \geq \theta(1 - \theta)^{t-2} \left[ pd_1'(p)\xi_t + s_t \xi_t \frac{\partial d_2(s_t|r_t)}{\partial r_t}\Bigg|_{r_t=p} \right]_{\substack{(q_i, s_i) \in S_t(s_1, \xi) \\ i=1, \dots, t}}. \end{aligned}$$

The first inequality follows as the marginal profit loss is at least that if the optimal decisions  $S_t(s_1, \xi)$  are adopted even when the retailer does not mark down in season 1, while the second and third inequalities follow from (7) and the concavity of  $d_1(r)$  and  $d(s, r)$ .

When  $\xi_t^\infty(q^*(r_t), r_t) \leq \xi_t < \frac{q^*(r_t)}{d(p, r_t)}$ , all the remaining inventory  $q^*(r_t) - d_1(r_t)\xi_t$  is sold in stage 2. Following a similar argument, we have that the marginal loss in season  $t$

$$\begin{aligned} & \left. \frac{\partial \{pd_1(r_t)\xi_t - cq^*(r_t) + s^*(\xi_t|r_t)[q^*(r_t) - d_1(r_t)\xi_t]\}}{\partial s_1} \right|_{s_1=p} \\ & \geq \left( \frac{\partial \{pd_1(r_t)\xi_t + s_t[q_t - d_1(r_t)\xi_t]\}}{\partial r_t} \cdot \frac{\partial r_t}{\partial s_1} \right) \Big|_{s_1=p}^{(q_i, s_i) \in S_t(s_1, \xi)}_{i=1, \dots, t} \\ & = \theta(1-\theta)^{t-2} [(p-s_t)d'_1(r_t)\xi_t]_{(q_i, s_i) \in S_t(s_1, \xi)}_{i=1, \dots, t} \geq 0. \end{aligned}$$

When  $\xi_t \geq \frac{q^*(r_t)}{d(p, r_t)}$ , all  $q^*(r_t)$  will be sold in stage 1 and the marginal loss in season  $t$  becomes

$$\left. \frac{\partial \{(p-c)q_t^*(r_t)\}}{\partial s_1} \right|_{s_1=p} \geq \left( \frac{\partial \{pq_t\}}{\partial r_t} \Big|_{q_t=q^*(r_t)} \cdot \frac{\partial r_t}{\partial s_1} \Big|_{s_1=p} \right)_{(q_i, s_i) \in S_t(s_1, \xi)}_{i=1, \dots, t} = 0.$$

Let  $\underline{s} = \min_{0 \leq r \leq p} \{s(r)\}$ . Then, it is never optimal for the retailer to offer a discount price lower than  $\underline{s}$  and hence, the reference will never be lower than  $\underline{s}$ . Note that

$$\begin{aligned} \xi_t^\infty(q^*(r_t), r_t) &= \frac{q^*(r_t)}{d(s^*(\xi_t^\infty(q^*(r_t), r_t)|r_t), r_t)} \geq \frac{q^*(r_t)}{d(\underline{s}(r_t), r_t)} = \frac{q^*(r_t)}{d(p, r_t)} \frac{d(p, r_t)}{d(\underline{s}(r_t), r_t)} \geq \frac{q^*(r_t)}{d(p, r_t)} \cdot \frac{d(p, r_t)}{d(\underline{s}, r_t)} \\ &\geq \frac{q^*(r_t)}{d(p, r_t)} \cdot \min_{s \leq r_t \leq p} \left\{ \frac{d(p, r_t)}{d(\underline{s}, r_t)} \right\} \geq F^{-1}\left(\frac{p-c}{p}\right) \cdot \frac{d(p, \underline{s})}{d(\underline{s}, \underline{s})} \end{aligned}$$

where the last inequality follows from the fact that  $\frac{q^*(r_t)}{d(p, r_t)} > F^{-1}\left(\frac{p-c}{p}\right)$ . The total marginal loss of a mark-down in season 1 at  $s_1$  is at least

$$\begin{aligned} & \sum_{t=2}^{\infty} \beta^{t-1} \theta(1-\theta)^{t-2} \mathbb{E} \left\{ \left[ \left( pd'_1(p)\xi_t + s_t \xi_t \frac{\partial d_2(s_t|r_t)}{\partial r_t} \Big|_{r_t=p} \right) \cdot \mathbf{1}\{\xi_t < \xi_t^\infty(q_t, r_t)\} \right]_{(q_i, s_i) \in S_t(s_1, \xi)}_{i=1, \dots, t} \right\} \\ & \geq \sum_{t=2}^{\infty} \beta^{t-1} \theta(1-\theta)^{t-2} \mathbb{E} \left\{ \left[ pd'_1(p) + \min_{s \leq r \leq p} \left\{ s \frac{\partial d_2(s|r)}{\partial r} \Big|_{r=p} \right\} \right] \xi_t \cdot \mathbf{1}\left\{ \xi_t < F^{-1}\left(\frac{p-c}{p}\right) \cdot \frac{d(p, \underline{s})}{d(\underline{s}, \underline{s})} \right\} \right\} \\ & \geq \frac{\theta}{\beta^{-1} - (1-\theta)} \left[ pd'_1(p) + \min_{s \leq r \leq p} \left\{ s \frac{\partial d_2(s|r)}{\partial r} \Big|_{r=p} \right\} \right] \int_0^{F^{-1}\left(\frac{p-c}{p}\right) \frac{d(p, \underline{s})}{d(\underline{s}, \underline{s})}} x dF(x). \end{aligned}$$

The retailer should never mark down if this minimum marginal future loss is greater than the maximum marginal gain in season  $t$ ,  $-\frac{\bar{q}}{d(p, p)} \frac{\partial \{s_1 d_2(s_1, p)\}}{\partial s_1} \Big|_{s_1=p}$ , which yields (2).  $\square$

*Proof of Proposition 6.* Let  $\bar{q}(r_t)$  and  $\bar{\pi}(q_t, r_t)$  be the optimal single season profit of the myopic retailer for given  $(q_t, r_t)$ . Consider  $\frac{\partial v(q_t, r_t)}{\partial q_t} = \frac{\partial \bar{\pi}(q_t, r_t)}{\partial q_t} + \beta \mathbb{E} \left[ \frac{\partial V(\theta s_t^\infty(\xi_t, q_t, r_t) + (1-\theta)r_t)}{\partial q_t} \right]$ . Since  $s_t^\infty(\xi_t, q_t, r_t)$  decreases in  $q_t$  and  $V(r)$  increases in  $r$ ,  $\frac{\partial \bar{\pi}(q_t, r_t)}{\partial q_t} \geq \frac{\partial v(q_t, r_t)}{\partial q_t}$  and hence  $\bar{q}(r_t) \geq q^*(r_t)$ . Given  $\xi_t$ , the myopic

retailer's problem is to maximize  $s_t \cdot \min\{d_2(s_t|r_t)\xi_t, [q_t - d_1(r_t)\xi_t]^+\}$ , while the retailer's optimal decisions are obtained by maximizing  $s_t \cdot \min\{d_2(s_t|r_t)\xi_t, [q_t - d_1(r_t)\xi_t]^+\} + \beta V(\theta s_t + (1 - \theta)r_t)$ . It is obvious that  $\bar{s}(\xi_t, r_t) \leq s_t^\infty(\xi_t, \bar{q}(r_t), r_t)$  since  $V(r_t)$  is increasing in  $r_t$ . Therefore,  $\bar{s}(\xi_t, r_t) \leq s_t^\infty(\xi_t, \bar{q}(r_t), r_t) \leq s_t^\infty(\xi_t, q^*(r_t), r_t) = s^*(\xi_t|r_t)$  for any  $\xi_t$ .  $\square$

*Proof of Proposition 7.* With deterministic demand, the retailer will order exactly the amount to be sold, i.e.,  $q^*(r_t) = d(s^*(r_t), r_t)$  and there is only one decision variable in each season. Thus, the single season profit function becomes  $(p - c)d_1(r_t) + (s_t - c)d_2(s_t|r_t)$ , which is concave in  $s_t$ . Next, we show that the single season profit function is jointly concave in  $(s_t, r_t)$  when  $\frac{\partial\{(s_t-c)d_2(s_t|r_t)\}}{\partial s_t} \leq 0$ . By Assumption 1.(2), the single season revenue function is jointly concave, i.e.,

$$\left[ pd_1''(r_t) + s_t \frac{\partial^2 d_2(s_t|r_t)}{\partial r_t^2} \right] \left[ s_t \frac{\partial^2 d_2(s_t|r_t)}{\partial s_t^2} + 2 \frac{\partial d_2(s_t|r_t)}{\partial s_t} \right] - \left[ s_t \frac{\partial^2 d_2(s_t|r_t)}{\partial s_t \partial r_t} + \frac{\partial d_2(s_t|r_t)}{\partial r_t} \right]^2 \geq 0.$$

Multiplying both sides by  $\left(\frac{s_t-c}{s_t}\right)^2$ , we have

$$\begin{aligned} 0 &\leq \left(\frac{s_t-c}{s_t}\right)^2 \left[ pd_1''(r_t) + s_t \frac{\partial^2 d_2(s_t|r_t)}{\partial r_t^2} \right] \left[ s_t \frac{\partial^2 d_2(s_t|r_t)}{\partial s_t^2} + 2 \frac{\partial d_2(s_t|r_t)}{\partial s_t} \right] - \left(\frac{s_t-c}{s_t}\right)^2 \left[ s_t \frac{\partial^2 d_2(s_t|r_t)}{\partial s_t \partial r_t} + \frac{\partial d_2(s_t|r_t)}{\partial r_t} \right]^2 \\ &= \left[ \left(p - \frac{p}{s_t}c\right) d_1''(r_t) + (s_t - c) \frac{\partial^2 d_2(s_t|r_t)}{\partial r_t^2} \right] \left[ \frac{(s_t - c) \partial^2 d_2(s_t|r_t)}{\partial s_t^2} + 2 \frac{s_t - c}{s_t} \frac{\partial d_2(s_t|r_t)}{\partial s_t} \right] - \left[ (s_t - c) \frac{\partial^2 d_2(s_t|r_t)}{\partial s_t \partial r_t} + \frac{s_t - c}{s_t} \frac{\partial d_2(s_t|r_t)}{\partial r_t} \right]^2 \\ &\leq \left[ (p - c) d_1''(r_t) + (s_t - c) \frac{\partial^2 d_2(s_t|r_t)}{\partial r_t^2} \right] \left[ \frac{(s_t - c) \partial^2 d_2(s_t|r_t)}{\partial s_t^2} + 2 \frac{\partial d_2(s_t|r_t)}{\partial s_t} \right] - \left[ (s_t - c) \frac{\partial^2 d_2(s_t|r_t)}{\partial s_t \partial r_t} + \frac{\partial d_2(s_t|r_t)}{\partial r_t} \right]^2 \end{aligned}$$

which is exactly the determinant of the Hessian of the single season profit function. The last inequality follows as  $d_1''(r_t) \leq 0$ ,  $\frac{\partial d_2(s_t|r_t)}{\partial s_t} \leq 0$ ,  $\frac{\partial d_2(s_t|r_t)}{\partial r_t} \leq 0$ , and  $\frac{\frac{\partial d_2(s_t|r_t)}{\partial s_t}}{\frac{\partial d_2(s_t|r_t)}{\partial r_t}}$  decreases in  $r_t$ , which implies that  $\frac{\partial^2 d_2(s_t|r_t)}{\partial s_t \partial r_t} d_2(s_t|r_t) \geq \frac{\partial d_2(s_t|r_t)}{\partial r_t} \frac{\partial d_2(s_t|r_t)}{\partial s_t}$  and hence

$$(s_t - c) \frac{\partial^2 d_2(s_t|r_t)}{\partial s_t \partial r_t} + \frac{s_t - c}{s_t} \frac{\partial d_2(s_t|r_t)}{\partial r_t} \geq (s_t - c) \frac{\partial^2 d_2(s_t|r_t)}{\partial s_t \partial r_t} + \frac{\partial d_2(s_t|r_t)}{\partial r_t} \geq \frac{\frac{\partial d_2(s_t|r_t)}{\partial r_t}}{d_2(s_t|r_t)} \cdot \frac{\partial\{(s_t-c)d_2(s_t|r_t)\}}{\partial s_t} \geq 0,$$

and by Assumption 1. Thus, the Hessian is negative semi-definite and the single season profit function is also jointly concave in  $(s_t, r_t)$  for  $\frac{\partial\{(s_t-c)d_2(s_t|r_t)\}}{\partial s_t} \leq 0$ . Following a similar argument as in the proof of Propostion 2, we can show the concavity of  $V(r_t)$ .

We now prove the monotonicity of the convergence of the reference price. Since  $r_{t+1} = \theta s_t + (1 - \theta)r_t$ , rewrite  $V(r_t)$  as

$$V(r_t) = \max_{\theta \underline{s}(r_t) + (1-\theta)r_t \leq r_{t+1} \leq \theta p + (1-\theta)r_t} \{u(r_t, r_{t+1}) + \beta V(r_{t+1})\},$$

and

$$u(r_t, r_{t+1}) = (p - c)d_1(r_t) + \left[ \frac{r_{t+1} - (1 - \theta)r_t}{\theta} - c \right] d_2 \left( \frac{r_{t+1} - (1 - \theta)r_t}{\theta} \middle| r_t \right).$$

Since

$$\frac{\partial^2 u(r_t, r_{t+1})}{\partial r_t \partial r_{t+1}} = \frac{1}{\theta} \left[ \frac{\partial^2 \{(s_t - c)d_2(s_t | r_t)\}}{\partial s_t \partial r_t} - \frac{(1 - \theta)}{\theta} \frac{\partial^2 \{(s_t - c)d_2(s_t | r_t)\}}{\partial s_t^2} \right]_{s_t = \frac{r_{t+1} - (1 - \theta)r_t}{\theta}} \geq 0,$$

as the unconstrained single season profit function  $(p - c)d_1(r_t) + (s_t - c)d_2(s_t | r_t)$  is concave and  $\frac{\partial^2 \{(s_t - c)d_2(s_t | r_t)\}}{\partial s_t \partial r_t} \geq \frac{\frac{\partial d_2(s_t | r_t)}{\partial r_t}}{d_2(s_t | r_t)} \times \frac{\partial \{(s_t - c)d_2(s_t | r_t)\}}{\partial s_t} \geq 0$  by Assumption 1,  $u(r_t, r_{t+1})$  is supermodular. By Theorem 2.8.2 in Topkis (1998),  $r_{t+1}^*(r_t) = \theta s^*(r_t) + (1 - \theta)r_t$  increases in  $r_t$  and the reference price converges monotonically for a given initial reference.  $\square$

*Proof of Proposition 8.* Let

$$\begin{aligned} e(r) &= \frac{1}{\beta} \left[ \frac{\partial u(r_t, r_{t+1})}{\partial r_{t+1}} + \beta \frac{\partial u(r_t, r_{t+1})}{\partial r_t} \right]_{r_t = r_{t+1} = r} \\ &= (p - c)d_1'(r) + (r - c) \frac{\partial d_2(s | r)}{\partial r} \Big|_{s=r} + \left( 1 + \frac{1 - \beta}{\beta \theta} \right) \left( (r - c) \frac{\partial d_2(s | r)}{\partial s} \Big|_{s=r} + d_2(r | r) \right). \end{aligned}$$

The proof follows because a boundary point 0 or  $p$  is a steady state if  $e(0) \leq 0$  or  $e(p) \geq 0$ , respectively, and an interior point  $r$  is a steady state if it satisfies the Euler equation of problem (3)  $e(r) = 0$ . Since  $d_1'(0) > 0$  and  $-c \frac{\partial d_2(s | 0)}{\partial s} \Big|_{s=0} + d_2(0 | 0) \geq 0$ , the lower bound 0 cannot be a steady state.  $\square$

## References

- Stokey, N., R. Lucas, and E. Prescott (1989). *Recursive Methods in Economic Dynamics*. Harvard University Press.
- Topkis, D. (1998). *Supermodularity and Complementarity*. Frontiers of Economic Research. Princeton University Press.
